# Supplementary material for: Interactions between Polygenetic Variants and Lifestyle Factors in Hypothyroidism: A Hospital-Based Cohort Study
Source: MDPI journal article supplement (doi:10.3390/nu15173850), 2023-09-03
Supplement: s1 [file s1]

## Supplementary materials

Figure S1. The distribution of genetic variants related to hypothyroidism

A. Manhattan plot of genetic variants related to hypothyroidism

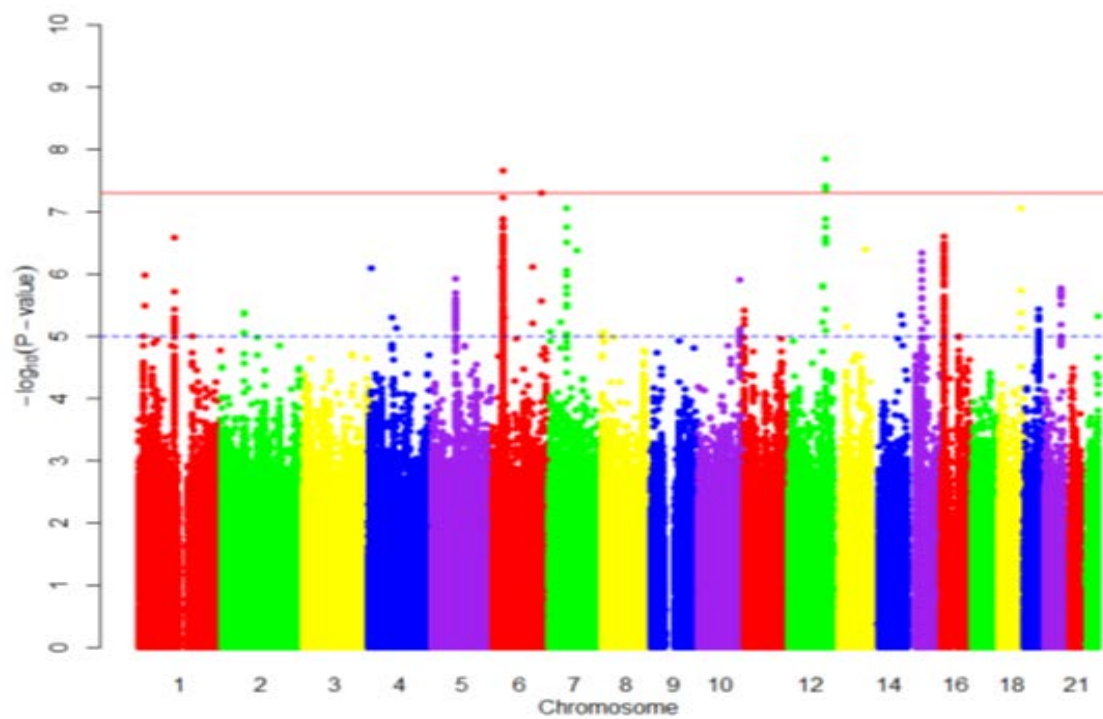

B. Q-Q plot of genetic variants related to hypothyroidism

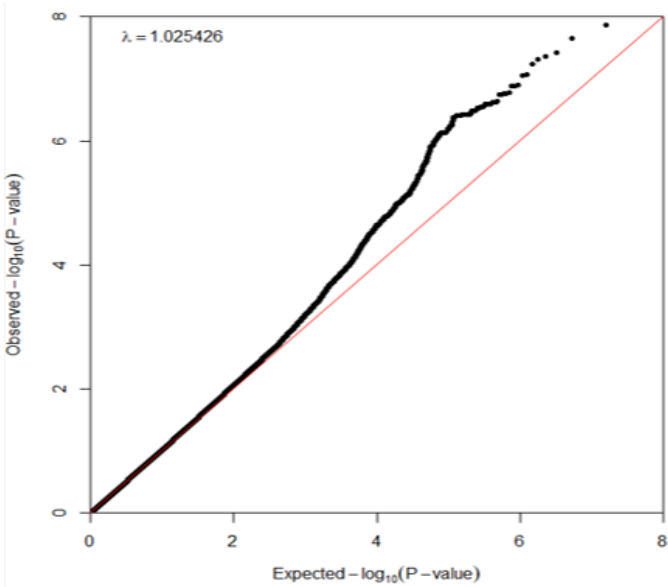

## Supplemental Tables

Table S1. The characteristics of the ten genetic variants of genes in the risk of inflammation used for the generalized multifactor dimensionality reduction analysis

| Model                                       | Adjusted sex, age, BMI |               |                        |              | Adjusted for sex, age, BMI, EER, fat and intake |               |                        |              |
|---------------------------------------------|------------------------|---------------|------------------------|--------------|-------------------------------------------------|---------------|------------------------|--------------|
|                                             | TRBA                   | TEBA          | P value                | CVC          | TRBA                                            | TEBA          | P value                | CVC          |
| DUOX1_rs1648314                             | 0.5352                 | 0.5286        | 8<br>(0.0547)          | 9/10         | 0.5358                                          | 0.5295        | 9<br>(0.0107)          | 9/10         |
| TSHR_rs75664963<br>plus model 1             | 0.5476                 | 0.5074        | 6<br>(0.3770)          | 3/10         | 0.5487                                          | 0.5119        | 6<br>(0.3770)          | 3/10         |
| <b>HLA-DQA1_rs17426593<br/>plus model 2</b> | <b>0.5668</b>          | <b>0.5634</b> | <b>10<br/>(0.0010)</b> | <b>10/10</b> | <b>0.5680</b>                                   | <b>0.5625</b> | <b>10<br/>(0.0010)</b> | <b>10/10</b> |
| SIRT3_rs11246015<br>plus model 3            | 0.5795                 | 0.5391        | 9<br>(0.0107)          | 5/10         | 0.5806                                          | 0.5421        | 10<br>(0.0010)         | 5/10         |
| VAV3_rs4915077<br>plus model 4              | 0.6017                 | 0.5566        | 9<br>(0.0107)          | 7/10         | 0.6027                                          | 0.5495        | 9<br>(0.0107)          | 9/10         |
| TNFRSF11B_rs1157<br>3856 plus model 5       | 0.6303                 | 0.5413        | 10<br>(0.0010)         | 5/10         | 0.6311                                          | 0.5341        | 9<br>(0.0107)          | 7/10         |
| <b>C6orf15_rs2233955<br/>plus model 6</b>   | <b>0.6699</b>          | <b>0.5491</b> | <b>9<br/>(0.0107)</b>  | <b>10/10</b> | <b>0.6706</b>                                   | <b>0.5467</b> | <b>9<br/>(0.0107)</b>  | <b>10/10</b> |
| TSHR_rs75664963<br>plus model 7             | 0.6971                 | 0.5306        | 10<br>(0.0010)         | 10/10        | 0.6972                                          | 0.5242        | 9<br>(0.0107)          | 10/10        |
| NRG1_rs1487155<br>plus model 8              | 0.7190                 | 0.5348        | 9<br>(0.0107)          | 10/10        | 0.7186                                          | 0.5332        | 9<br>(0.0107)          | 10/10        |
| HORMAD2_rs1169<br>50391 plus model 9        | 0.7303                 | 0.5448        | 9<br>(0.0107)          | 10/10        | 0.7300                                          | 0.5410        | 9<br>(0.0107)          | 10/10        |

*CRP*, high-sensitive C-reactive protein; *GUSBP2*, glucuronidase, beta pseudogene 2; *HNF-1α*, hepatocyte nuclear factor-1 alpha; *GSTP1*, glutathione S-transferase P-1; *IL1B*, interleukin-1b; *NOS2*, nitric oxide synthase-2; *C12orf43*, chromosome 12 open reading frame 43; *OASL*, 2'-5'-oligoadenylate synthetase like; *TOMM40t*, translocase of outer mitochondrial membrane 40; *APOE*, apolipoprotein E; (rs429358, *APOC1P1*, apolipoprotein C-I pseudogene 1; *TLDC2*, TBC/LysM-associated domain containing 2.

Table S2. Adjusted odds ratios for the risk of hypothyroidism by polygenetic risk scores of the 3 SNPs model (PRS) for gene-gene interaction after covariate adjustments

|              |   | Model 1    |             |             | Model 2     |             |
|--------------|---|------------|-------------|-------------|-------------|-------------|
|              |   | Low-PRS    | Medium-PRS  | High-PRS    | Medium-PRS  | High-PRS    |
|              |   | (N=13,856) | (N=25,608)  | (N=17,200)  | (N=25,608)  | (N=17,200)  |
| WBC 1        | 1 |            | 1.053 0.955 | 1.120 0.998 | 1.051 0.953 | 1.127 1.004 |
|              |   |            | 1.161       | 1.256       | 1.161       | 1.266       |
| CRP 1        | 1 |            | 0.946 0.798 | 1.076 0.887 | 0.946 0.798 | 1.069 0.880 |
|              |   |            | 1.121       | 1.305       | 1.122       | 1.299       |
| MetS         | 1 |            | 1.028 0.935 | 1.011 0.906 | 1.031 0.937 | 1.019 0.912 |
|              |   |            | 1.130       | 1.128       | 1.134       | 1.138       |
| Osteoporosis | 1 |            | 0.950 0.828 | 0.911 0.775 | 0.946 0.824 | 0.896 0.761 |
|              |   |            | 1.090       | 1.070       | 1.087       | 1.055       |
| Arthritis    | 1 |            | 1.059 0.944 | 1.045 0.915 | 1.052 0.937 | 1.033 0.903 |
|              |   |            | 1.188       | 1.194       | 1.181       | 1.181       |
| Asthma       | 1 |            | 1.417 1.067 | 1.292 1.001 | 1.293 1.001 | 1.430 1.075 |
|              |   |            | 1.882       | 1.666       | 1.672       | 1.903       |
| Thyroid      |   |            | 0.984 0.712 | 1.087 0.751 | 0.979 0.708 | 1.093 0.755 |
| cancer       |   |            | 1.360       | 1.572       | 1.354       | 1.580       |
| Cancer       | 1 |            | 0.868 0.750 | 0.937 0.791 | 0.869 0.750 | 0.938 0.791 |
|              |   |            | 1.005       | 1.110       | 1.007       | 1.113       |
| BMI          | 1 |            | 1.060 0.993 | 1.008 0.935 | 1.059 0.991 | 1.008 0.935 |
|              |   |            | 1.131       | 1.088       | 1.131       | 1.088       |
| Waist        | 1 |            | 1.017 0.942 | 0.953 0.872 | 1.009 0.935 | 0.948 0.867 |
|              |   |            | 1.098       | 1.041       | 1.090       | 1.037       |
| Height       |   |            | 0.969 0.904 | 1.019 0.940 | 0.968 0.902 | 1.014 0.936 |
|              |   |            | 1.039       | 1.104       | 1.038       | 1.099       |
| Serum        | 1 |            | 1.008 0.908 | 1.054 0.935 | 1.004 0.904 | 1.057 0.937 |

|             |   |       |       |       |       |       |       |       |       |
|-------------|---|-------|-------|-------|-------|-------|-------|-------|-------|
| glucose     |   |       | 1.118 | 1.188 | 1.114 | 1.192 |       |       |       |
| Serum total | 1 | 1.010 | 0.940 | 0.964 | 0.886 | 1.008 | 0.937 | 0.959 | 0.881 |
| cholesterol |   |       | 1.086 | 1.048 | 1.084 | 1.043 |       |       |       |
| Serum HDL   | 1 | 0.989 | 0.923 | 0.965 | 0.890 | 0.996 | 0.928 | 0.969 | 0.893 |
|             |   |       | 1.060 | 1.046 | 1.068 | 1.051 |       |       |       |
| Serum TG    | 1 | 0.970 | 0.906 | 0.943 | 0.872 | 0.972 | 0.907 | 0.944 | 0.871 |
|             |   |       | 1.038 | 1.021 | 1.041 | 1.022 |       |       |       |
| SBP         | 1 | 0.989 | 0.923 | 0.965 | 0.890 | 0.935 | 0.876 | 0.932 | 0.864 |
|             |   |       | 1.060 | 1.046 | 1.001 | 1.006 |       |       |       |
| DBP         | 1 | 0.960 | 0.891 | 0.946 | 0.868 | 0.960 | 0.891 | 0.949 | 0.871 |
|             |   |       | 1.034 | 1.031 | 1.035 | 1.035 |       |       |       |

Values represented adjusted odds ratio and 95% confidence intervals.

Gene-gene interaction model with 6 SNPs included *CRP*\_rs386636005, *GUSBP2*\_rs1250561232, *OASL*\_rs201853167, *APOC1*\_rs56131196, *TLDC2*\_rs59310406, and *HNF1A*\_rs1169286. Gene-gene interaction model with 7 SNPs included 6 SNPs in the 6 SNP model plus *C12orf43*\_rs2257764.

Low-GRS, medium-GRS and high-GRS were divided into 0-4, 5-6 and >6 risk alleles for 6 SNPs GMDR model, respectively and 0-5, 6-7, >7 risk alleles for 7 SNPs GMDR model, respectively.

Number of the participants was for 6 SNP model of serum CRP concentrations.

Covariates of the model 1 was age, genders, BMI, residence areas, education, income, and daily energy intake and those of the model 2 was covariate for model 1 plus smoking and drinking status, exercise, white blood cell counts, seaweed intake, percent fat intake, and percent carbohydrate intake.
